# Supplementary material
Source: PubMed Central journal article supplement (PMC3861793)
Supplement: jn.113.183160_nutrition183160SupplementaryData1.pdf [file jn.113.183160_nutrition183160SupplementaryData1.pdf]

## Online Supporting Material

**Supplemental Table 1. *Atp7a* mRNA-specific shRNAs and negative control (NC) shRNA sequences**

| Accession #           | NM052803 | shRNA Sequences                                           |
|-----------------------|----------|-----------------------------------------------------------|
| <b><i>Atp7a-1</i></b> |          |                                                           |
| Top oligo             |          | 5'-CACCGCAACGAACAAAGCACATATTCGAAAATATGTGCTTTGTTTCGTTGC-3' |
| Bottom oligo          |          | 3'-AAAAGCAACGAACAAAGCACATATTTTCGAATATGTGCTTTGTTTCGTTGC-5' |
| <br>                  |          |                                                           |
| <b><i>Atp7a-2</i></b> |          |                                                           |
| Top oligo             |          | 5'-CACCGGACGAGTCTATGATTGAACACGAATGTTCAATCATAGACTCGTC-3'   |
| Bottom oligo          |          | 3'-AAAAGGACGAGTCTATGATTGAACATTCGTGTTCAATCATAGACTCGTCC-5'  |
| <br>                  |          |                                                           |
| <b><i>Atp7a-3</i></b> |          |                                                           |
| Top oligo             |          | 5'-CACCGCCTCTGACCCAAGAAGTTGTTCGAAACAACCTTCTTGGGTCAGAGG-3' |
| Bottom oligo          |          | 3'-AAAAGCCTCTGACCCAAGAAGTTGTTTCGACAACCTTCTTGGGTCAGAGG-5'  |
| <br>                  |          |                                                           |
| <b>NC</b>             |          |                                                           |
| Top oligo             |          | 5'-CACCGTCTCCACGCGCAGTACATTTTCGAAAAATGTACTGCGCGTGGAGA-3'  |
| Bottom oligo          |          | 3'-AAAAGTCTCCACGCGCAGTACATTTTCGAAATGTACTGCGCGTGGAGA-5'    |
