# Supplementary material
Source: PubMed Central journal article supplement (PMC3861793)
Supplement: jn.113.183160_nutrition183160SupplementaryData2.pdf [file jn.113.183160_nutrition183160SupplementaryData2.pdf]

## Online Supporting Material

**Supplemental Table 2. Sequences of qRT-PCR primers**

| Gene                    | Direction* | Primer Sequence                   |
|-------------------------|------------|-----------------------------------|
| <i>Atp7a</i>            | F          | 5'-TGAACAGTCATCACCTTCATCGTC-3'    |
|                         | R          | 5'-GCGATCAAGCCACACAGTTCA-3'       |
| <i>Atp7b</i>            | F          | 5'-TTAGCATCCTGGGCATGACTTG-3'      |
|                         | R          | 5'-TTGGTGTGTGAGGAGTCCTCTAGTGT-3'  |
| <i>Ctr1</i>             | F          | 5'-CTACTTTGGCTTTAAGAATGTGGACC-3'  |
|                         | R          | 5'-AACATTGCTAGTAAAAACACTGCCAC-3'  |
| Cyclophilin             | F          | 5'-CTTGCTGCAATGGTCAACC-3'         |
|                         | R          | 5'-TGCTGTCTTTGGAACCTTGTCTGC-3'    |
| <i>Dcytb</i>            | F          | 5'-CGTGTGTTGATTATCACAATGTCCG-3'   |
|                         | R          | 5'-CACCGTGGCAATCACTGTTCC-3'       |
| <i>Dcytb</i><br>(hnRNA) | F          | 5'-CCTCTTTGGAACAGTGATTGCC-3'      |
|                         | R          | 5'-GAAGAAGGCTACAGACTTACAGGACA-3'  |
| <i>Dmt1</i>             | F          | 5'-GCATCTTGGTCCTTCTCGTCTGC-3'     |
|                         | R          | 5'-AACACACTGGCTCTGATGGCTCC-3'     |
| <i>Fpn1</i>             | F          | 5'-TCGTAGCAGGAGAAAACAGGAGC-3'     |
|                         | R          | 5'-GGAACCGAATGTCATAATCTGC-3'      |
| <i>Fpn1</i><br>(hnRNA)  | F          | 5'-TGCAGTGTCTGTGTTTCTGGTGG-3'     |
|                         | R          | 5'-ATGTAAGTCACTCACCTTTAAGTCTGG-3' |
| Ferritin                | F          | 5'-ACTCGGAGGCTGCCATCAAC-3'        |
|                         | R          | 5'-GAAGATTCTGCCACCTCGCTG-3'       |
| <i>Heph</i>             | F          | 5'-ACACTCTACAGCTTCAGGGCATGA-3'    |
|                         | R          | 5'-CTGTCAGGGCAATAATCCCATTCT-3'    |
| <i>Mt1a</i>             | F          | 5'-CTTCTTGTCGCTTACACCGTTG-3'      |
|                         | R          | 5'-CAGCAGCACTGTTTCGTCCTTC-3'      |
| <i>Tfr1</i>             | F          | 5'-ATTGCGGACTGAGGAGGTGC-3'        |
|                         | R          | 5'-CCATCATTCTCAGTTGTACAAGGGAG-3'  |

\*F, forward; R, reverse
